# Supplementary material for: Different phases of few-layer MoS2 and their silver/gold nanocomposites for efficient hydrogen evolution reaction
Source: Royal Society of Chemistry journal article supplement (doi:10.1039/c9cy02158b), 2019-11-19
Supplement: c9cy02158b1.pdf [file c9cy02158b1.pdf]

**Different Phases of Few-layer MoS<sub>2</sub> and their Silver/Gold  
Nanocomposites for Efficient Hydrogen Evolution Reaction**

Jing Wang, Wenhui Fang, Ye Hu, Yuhua Zhang, Jiaqi Dang, Ying Wu,

Hong Zhao\*, Zengxi Li\*

*School of Chemical Sciences, University of Chinese Academy of Sciences, 19A YuQuan Road, Beijing*

*100049, China*

---

\* Corresponding author: Tel.: +86-10-88256093. E-mail address: hongzhao@ucas.ac.cn (H. Zhao);

lizengxi@ucas.ac.cn (Z. Li).

**Table 1.** Summary of phase content for products obtained at 160, 180, 170, 190, 200,

| Temperature (°C) | the percentage of 1T phase | the percentage of 2H phase |
|------------------|----------------------------|----------------------------|
| 160              | 72.1%                      | 27.9%                      |
| 170              | 75.6%                      | 24.4%                      |
| 180              | 80.1%                      | 19.9%                      |
| 190              | 68.0%                      | 32.0%                      |
| 200              | 57.6%                      | 42.4%                      |
| 210              | 16.3%                      | 83.7%                      |
| 220              | 15.6%                      | 84.4%                      |

210 and 220°C.

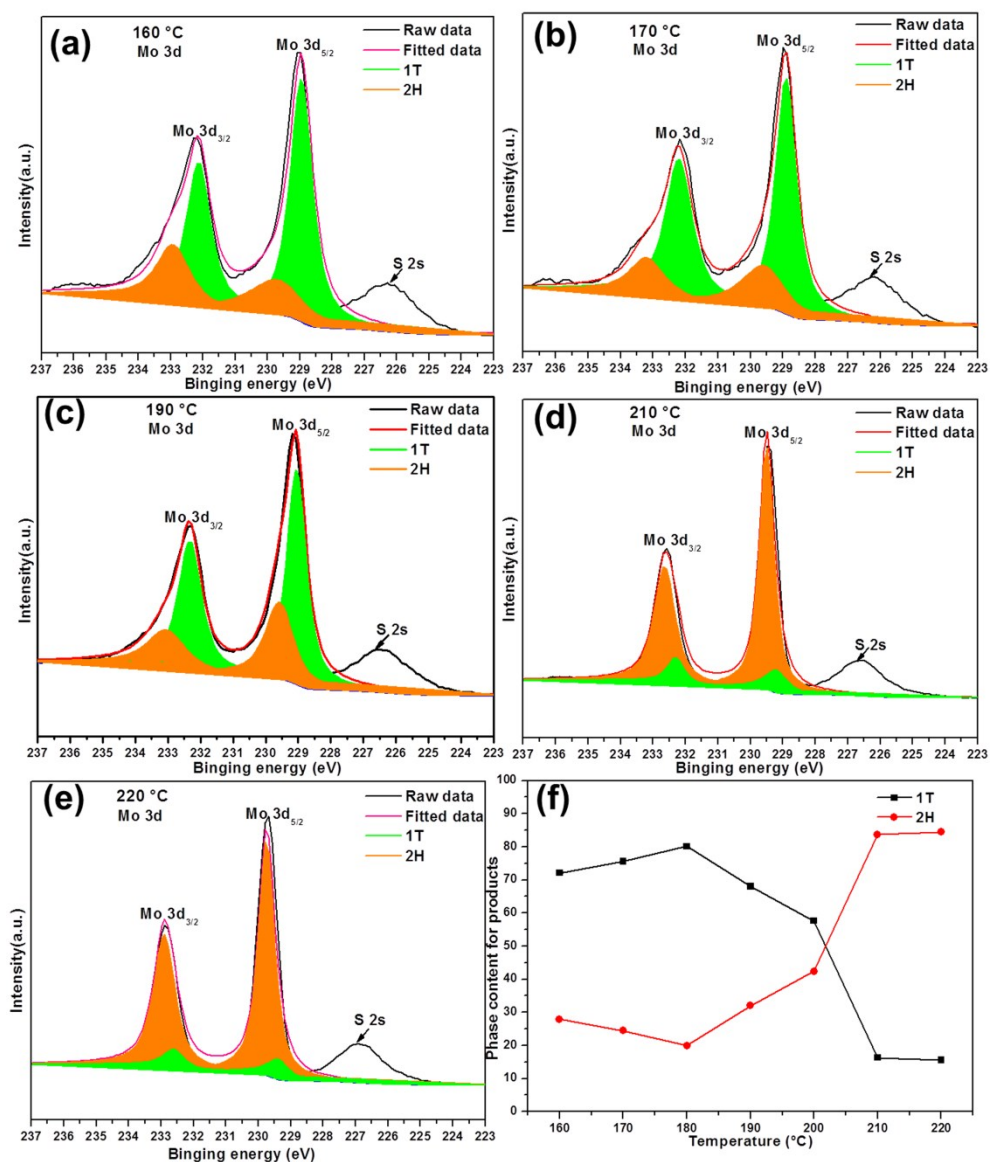

**Fig. S1.** High-resolution XPS Mo 3d spectra of the products obtained at (a) 160°C, (b) 170°C, (c) 190°C, (d) 210°C and (e) 220°C, and (f) the 1T and 2H phase content for products obtained at different temperature.

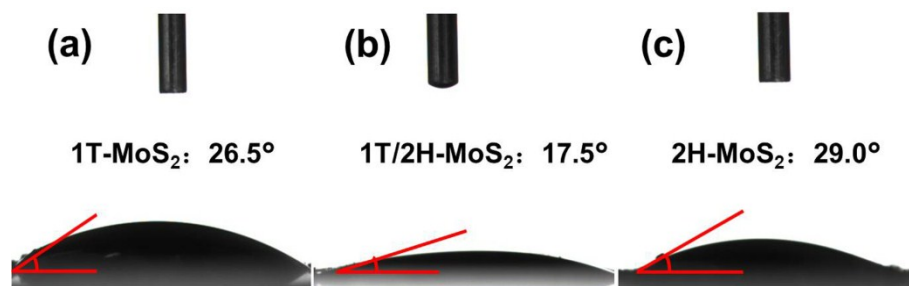

**Fig. S2.** Contact angle of water droplets on the surface of (a) 1T-MoS<sub>2</sub>, (b) 1T/2H-MoS<sub>2</sub> and (c) 2H-MoS<sub>2</sub>, respectively.

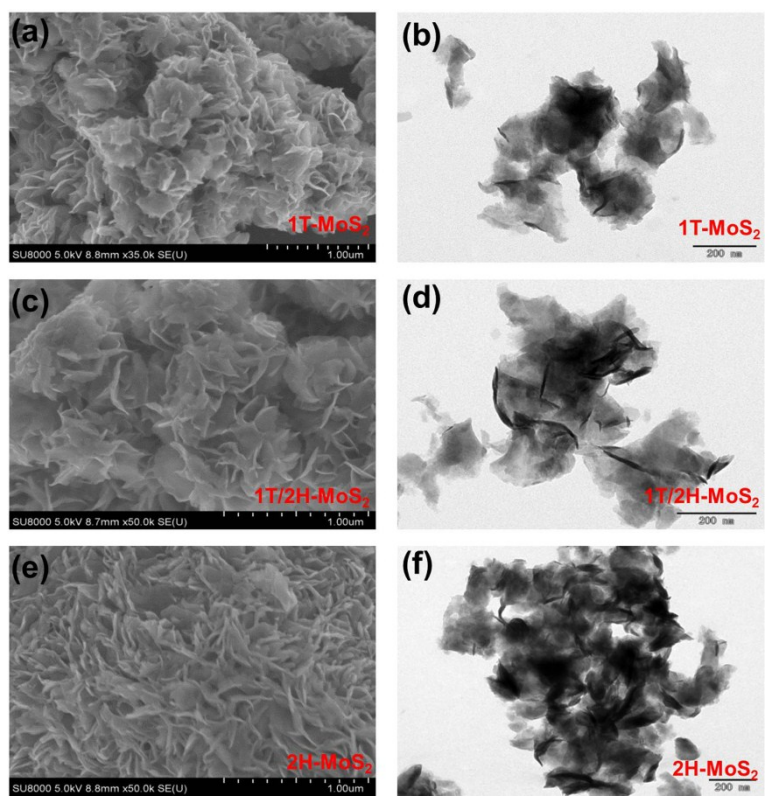

**Fig. S3.** SEM and TEM images of (a, b) 1T-MoS<sub>2</sub>, (c, d) 1T/2H-MoS<sub>2</sub>, and (e, f) 2H-MoS<sub>2</sub>, respectively.

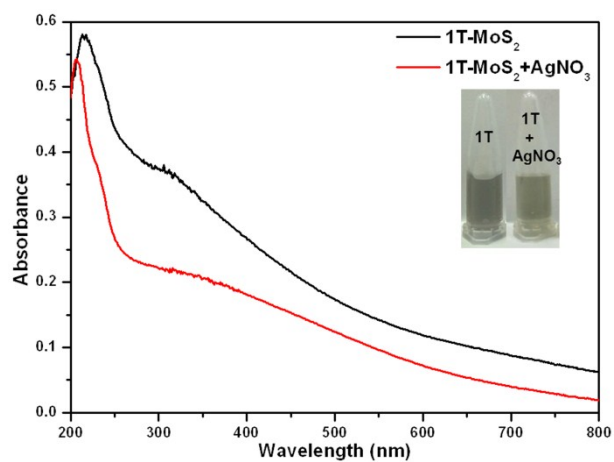

**Fig. S4.** UV-vis spectra of 1T-MoS<sub>2</sub>, the mixture of 1T-MoS<sub>2</sub> and AgNO<sub>3</sub> (inset: photo images of the color 1T-MoS<sub>2</sub> (0.075 mg mL<sup>-1</sup>), the mixture of 1T-MoS<sub>2</sub> (0.075 mg mL<sup>-1</sup>) and AgNO<sub>3</sub> (0.1 mM)).

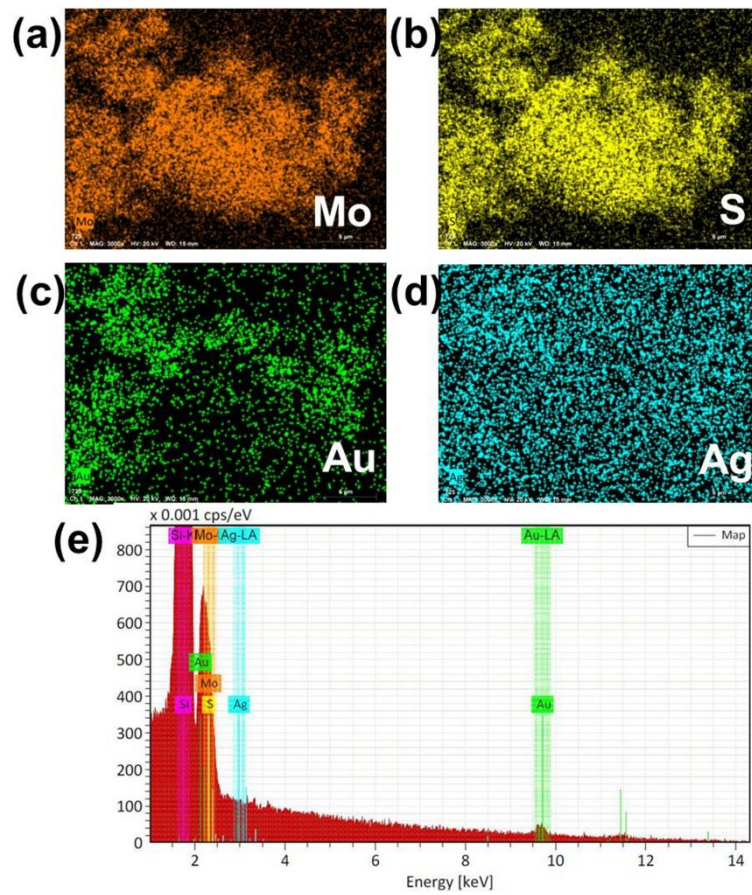

**Fig. S5.** The EDX elemental mapping images for 1T-MoS<sub>2</sub>@Ag/AuNPs (a) Mo, (b) S, (c) Au, (d) Ag and (e) the EDX spectrum of 1T-MoS<sub>2</sub>@Ag/AuNPs.

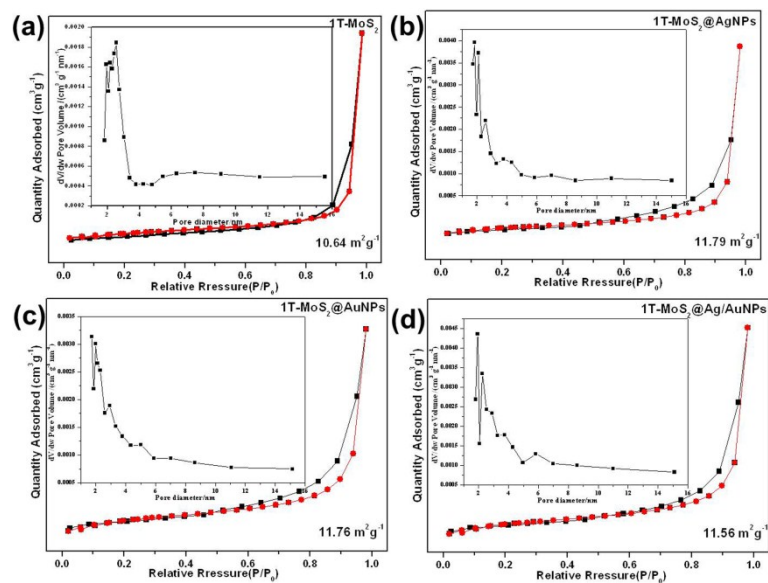

**Fig. S6.** Nitrogen adsorption-desorption isotherms at 77K and the BJH pore-size distributions (insets) of (a) 1T-MoS<sub>2</sub>, (b) 1T-MoS<sub>2</sub>@AgNPs, (c) 1T-MoS<sub>2</sub>@AuNPs and (d) 1T-MoS<sub>2</sub>@Ag/AuNPs nanosheets.



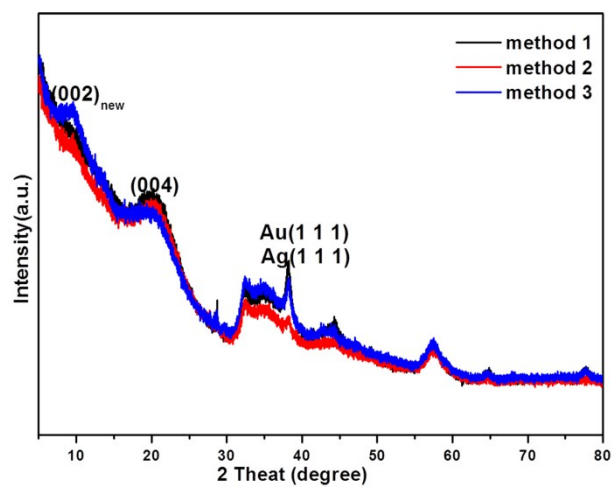

**Fig. S7.** XRD spectra of 1T-MoS<sub>2</sub>@Ag/AuNPs obtained by three different methods.

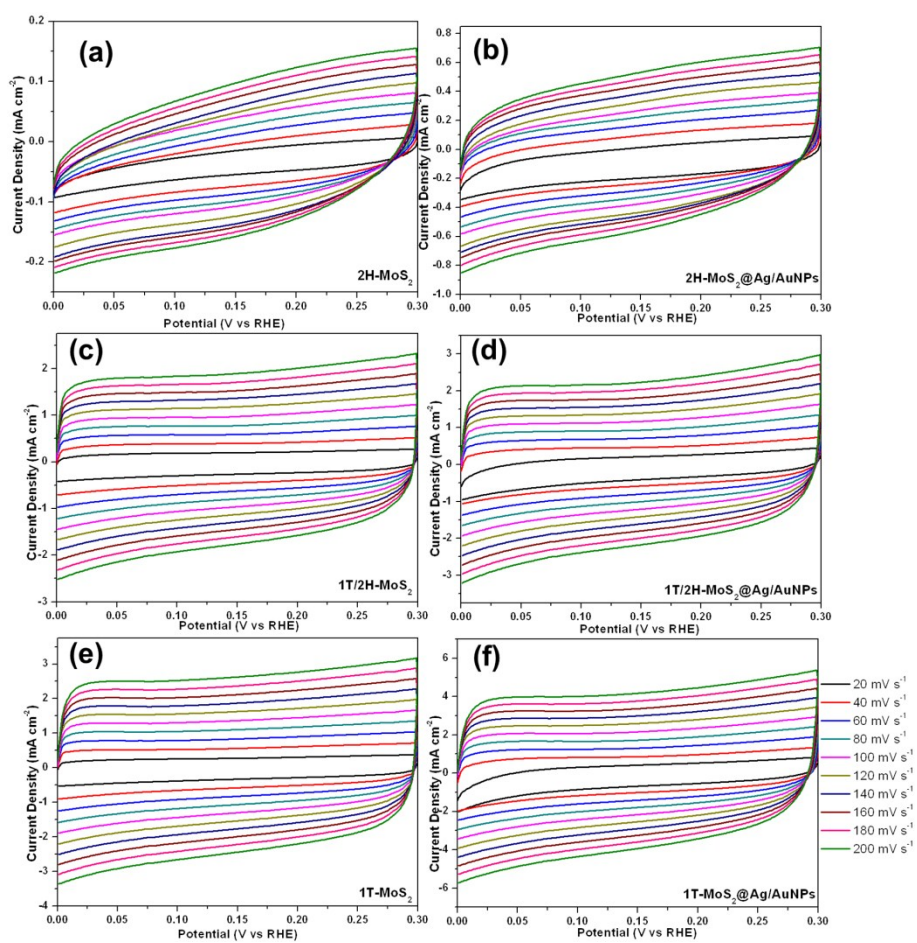

**Fig. S8.** Cyclic voltammety curves of the six representative MoS<sub>2</sub> nanosheet samples in 0.5 M H<sub>2</sub>SO<sub>4</sub> under different scan rates (20–200 mV s<sup>-1</sup>) were measured in the region of 0 to 0.3 V vs. RHE.
